# Supplementary material
Source: PubMed Central journal article supplement (PMC3122436)

1 **Supplemental Figure Legends.**

2

3 **Supp. Fig. 1. Screen shots from CLC Genomics Workbench.** In the local alignment (top), the  
4 DAP-B IS256 insertion is not detected by polymorphism analysis. In the global alignment  
5 (bottom), the DAP-B IS256 insertion is detected as multiple, consecutive polymorphisms  
6 surrounding the insertion site.

7

8 **Supp. Fig. 2. Alignment of all *E. faecalis* EF0631 protein sequences from this study.** Identical  
9 amino acids are shaded in grey; amino acid changes are shown in white. The location of the  
10 DAP-A N77\_Q79del is boxed in green. Predicted PLD motifs are shown. The location of the DAP-  
11 B and DAP-C R218Q substitution is indicated by an asterisk. Amino acids encoded after the  
12 frameshift mutation in *E. faecalis* T2 are not shown.

13

14 **Supp. Fig. 3. Alignment of EF0631 and EF1608 predicted cardiolipin synthases.** Identical and  
15 similar amino acids are shaded in grey; non-similar amino acids are shown in white. The  
16 location of the DAP-A N77\_Q79del is boxed in green. Predicted PLD motifs are shown. The  
17 location of the DAP-B and DAP-C R218Q substitution is indicated by an asterisk.

18

19 **Supp. Fig. 4. Alignment of EF1797 sequences from *E. faecalis*, *E. faecium* and *Listeria* sp.**  
20 Identical and similar amino acids are shaded in grey; non-similar amino acids are shown in  
21 white. The green bar indicates the location of the DAP-C G130\_F154del.

22

23 **Supp. Fig. 5. Alignment of EF0631 sequences from *E. faecalis* and *E. faecium*.** Identical amino  
24 acids are shown in dark grey, similar amino acids are shaded in light grey, and non-similar  
25 amino acids are shown in white. The location of the DAP-A N77\_Q79del is boxed in green.  
26 Predicted PLD motifs are shown. The location of the DAP-B and DAP-C R218Q substitution is  
27 indicated by an asterisk.

28

29

1 Supplemental Fig. 1

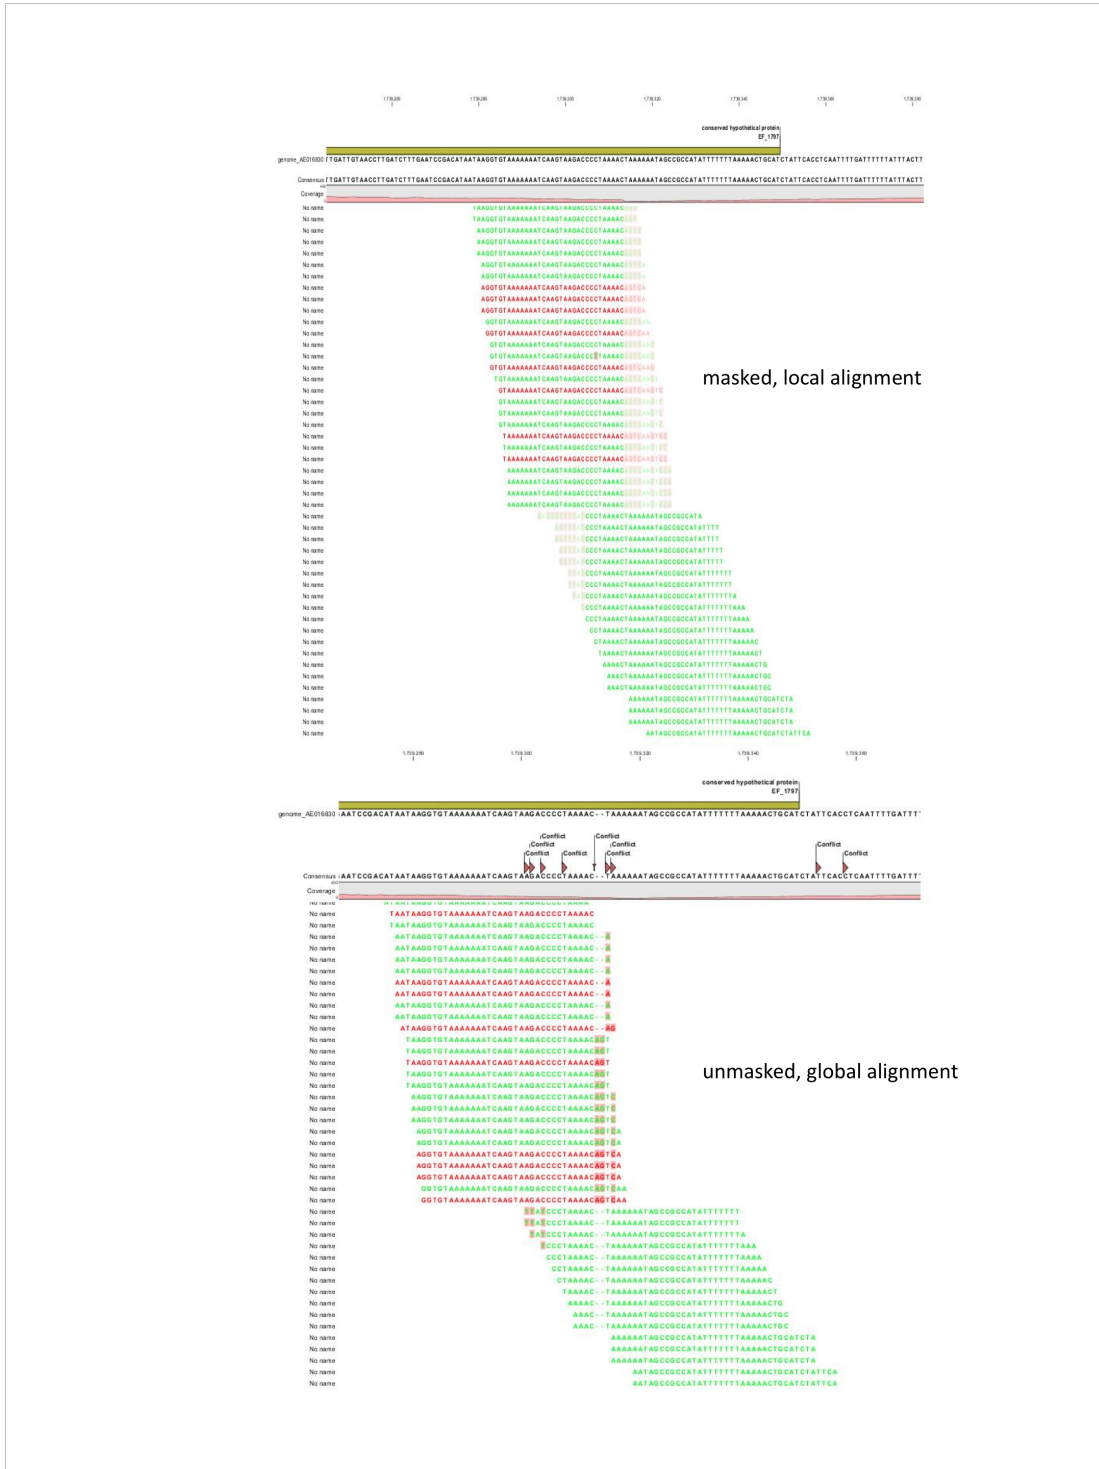

2  
3

1 Supplemental Fig. 2.

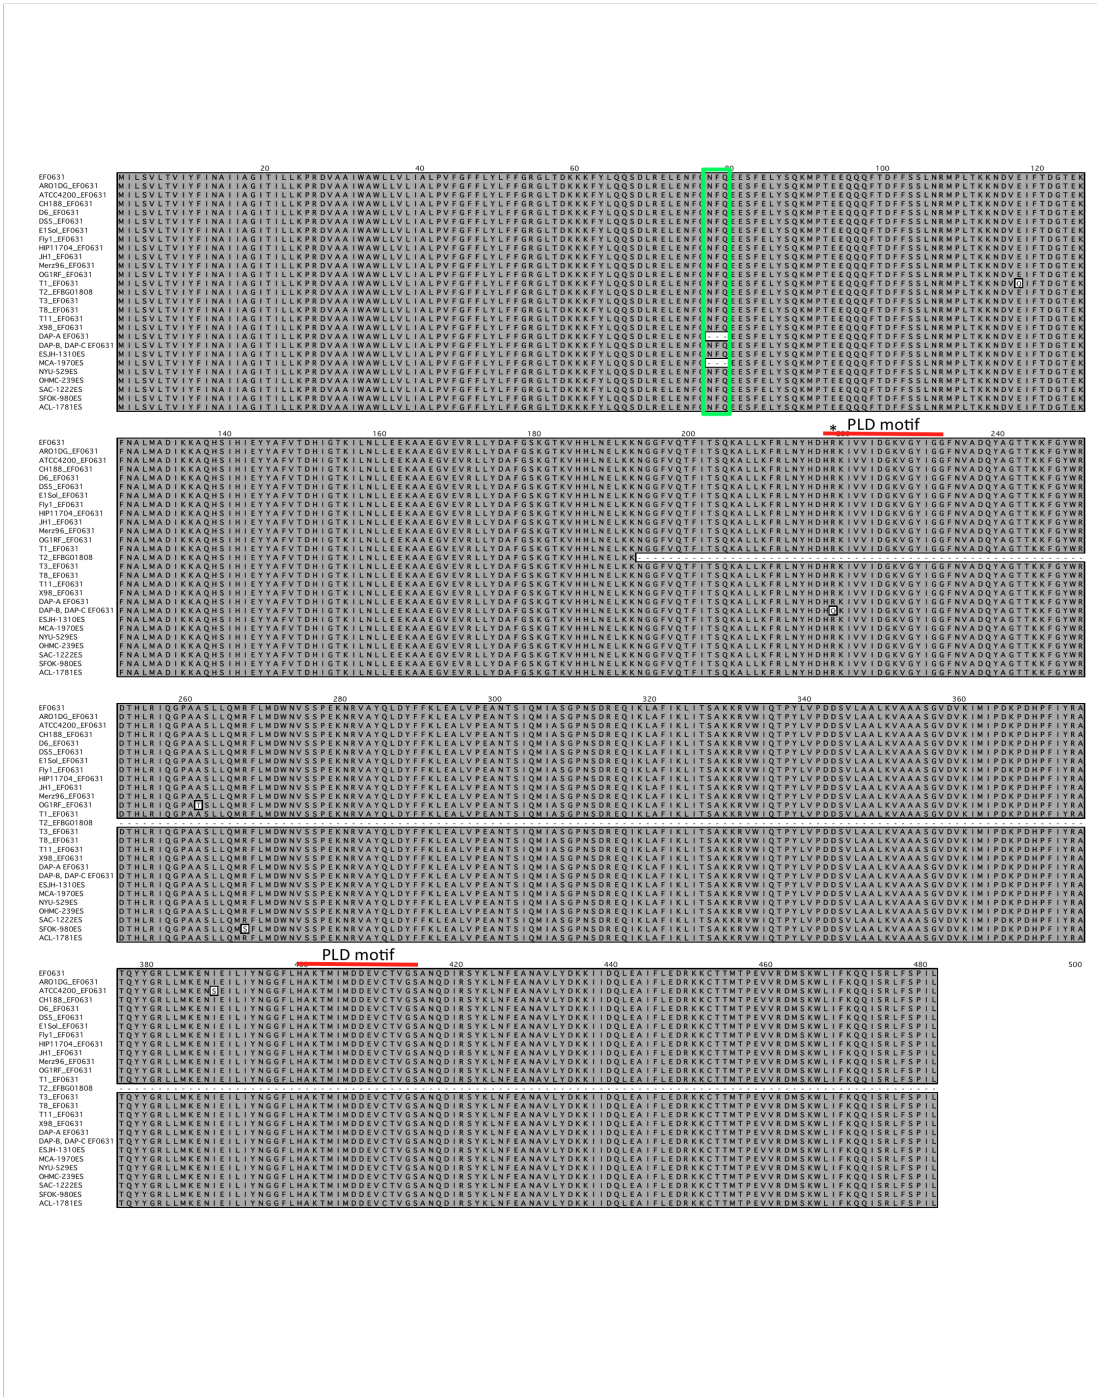

1 Supplemental Fig. 3.

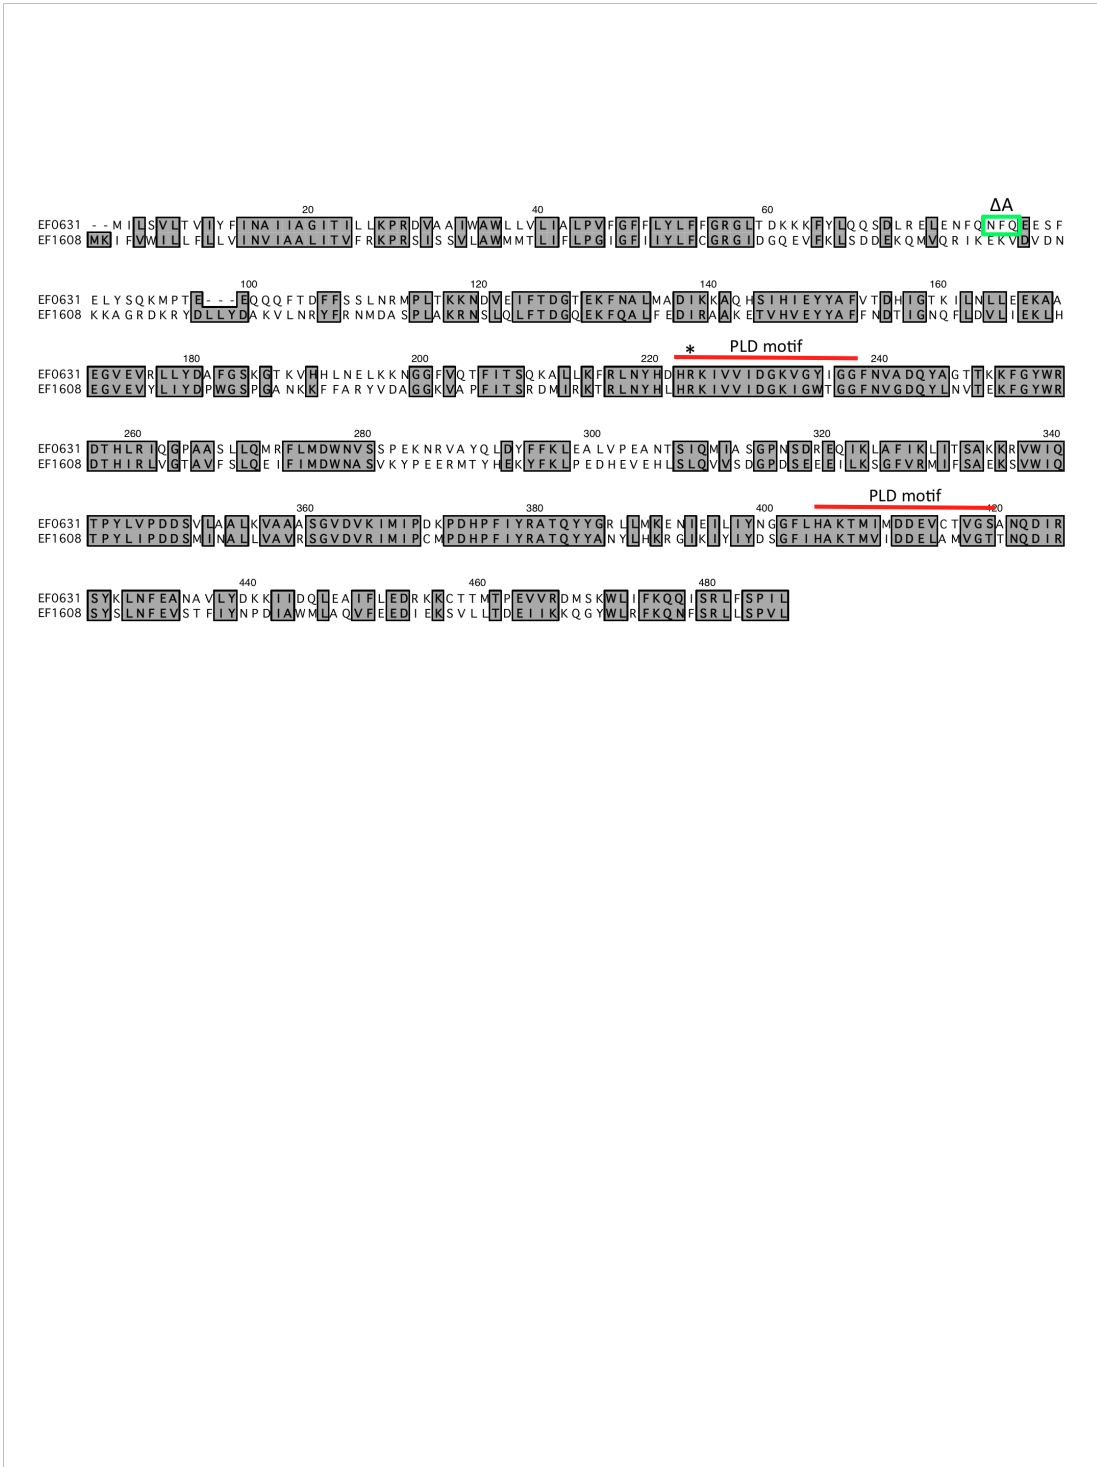

2  
3

1 Supp. Figure 4.

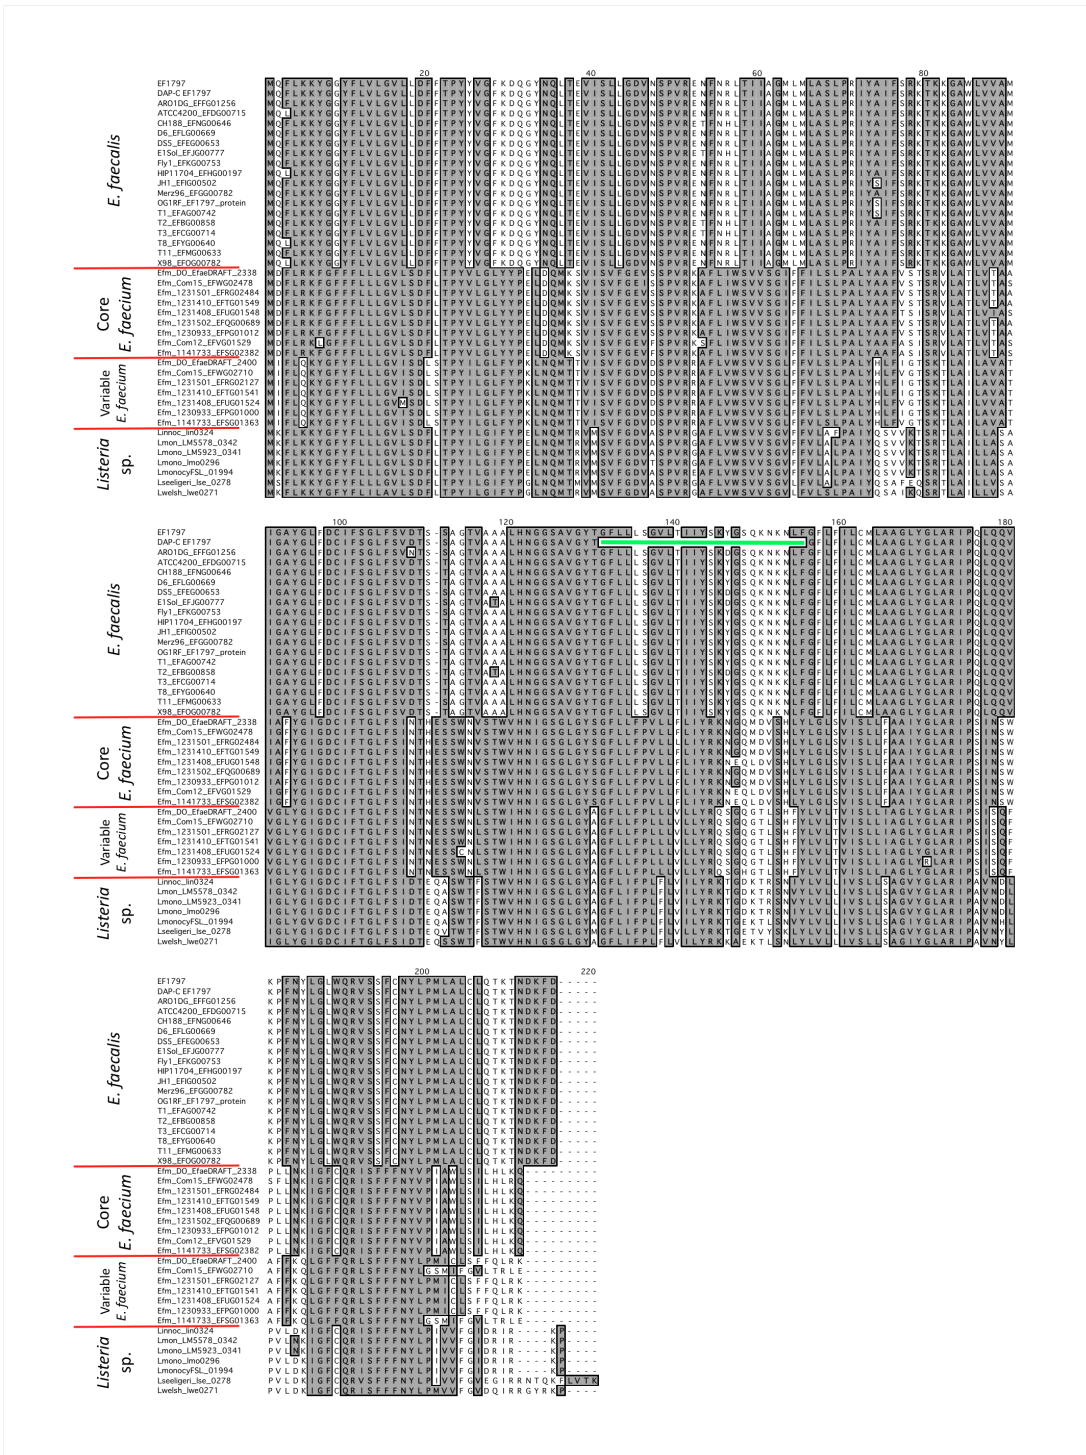

1 Supp. Figure 5.

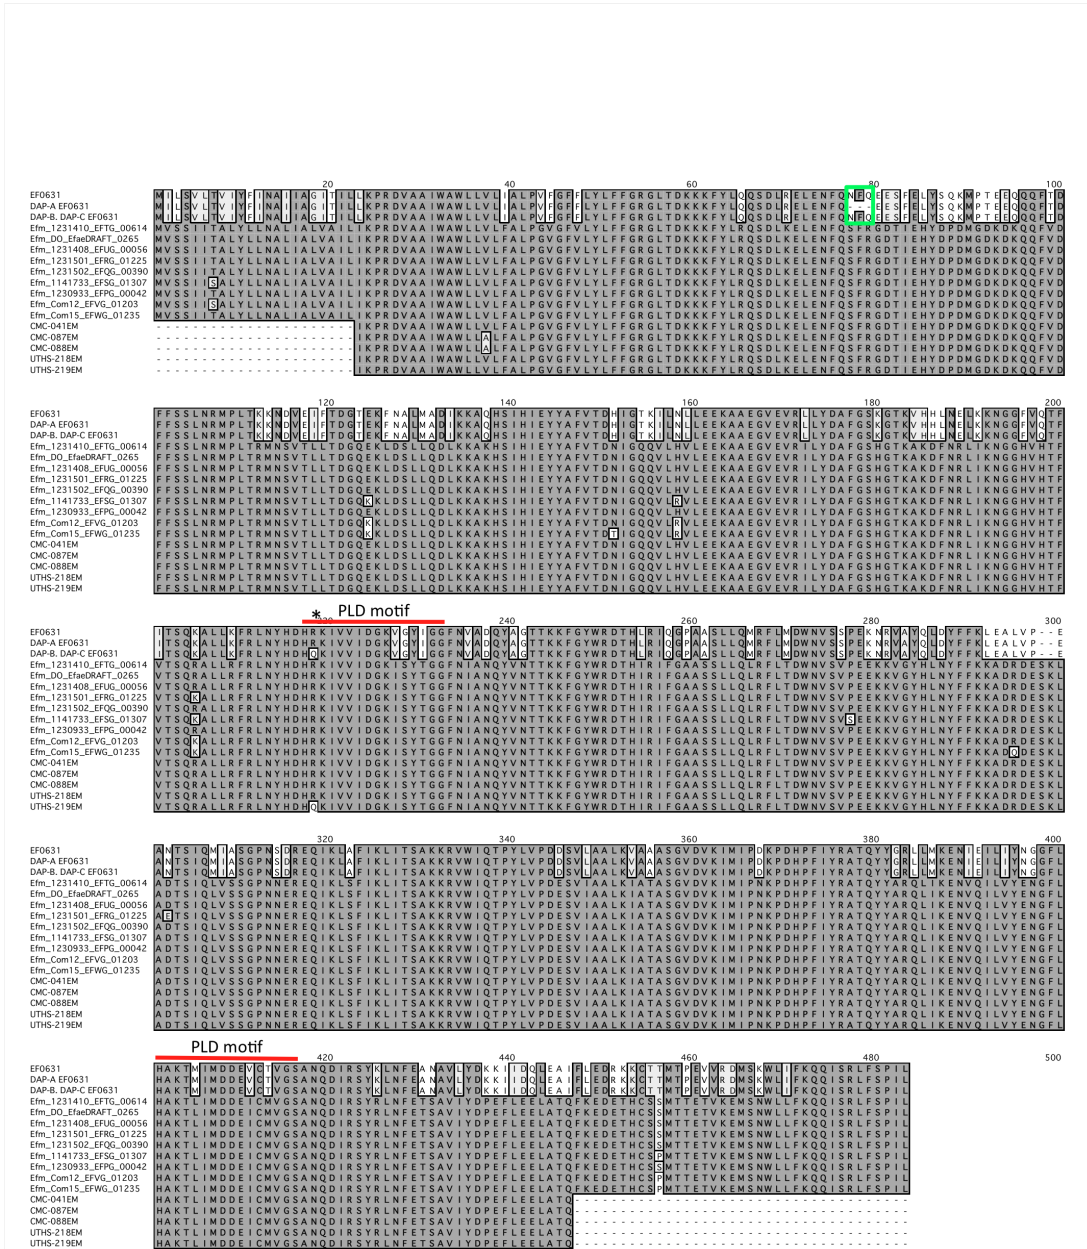

Supplement: supp_55_7_3345__1.pdf [file supp_55_7_3345__1.pdf]
