# Supplementary material
Source: PubMed Central journal article supplement (PMC3122436)
Supplement: supp_55_7_3345__2.pdf [file supp_55_7_3345__2.pdf]

**Supplemental Table 1. Primers used in this study.**

| Primer name                             | Sequence                    | Comments and expected product size             |
|-----------------------------------------|-----------------------------|------------------------------------------------|
| <u>Closure of zero coverage regions</u> |                             |                                                |
| EF0639 For                              | GCT TGT GAG AAG TCC AGC AA  | 538 bp                                         |
| EF0639 Rev                              | CGC ACG TCG TTT ATT GCA AG  |                                                |
| ig EF1155-56 For                        | GCG AAT GTT ACT GAA GTT GAG | 435 bp                                         |
| ig EF1155-56 Rev                        | GCA CTT ACA TAC AGA CCG TC  |                                                |
| EF1797 For                              | CCA CTG TTA CTG GTG AAG TC  | 944 bp. Also used for serial passage cultures. |
| EF1797 Rev                              | GCA GTT CCT GTT GCT GCA AT  |                                                |
| EF2294 <i>vanB</i> For                  | CAC CTC TCT ATC GCC AAT GT  | 376 bp                                         |
| EF2294 <i>vanB</i> Rev                  | GTC ATG GGA AAC GAG GAT GA  |                                                |
| ig EF2300-02 For                        | GTG GTT ATC AGA GCT TTC CG  | 419 bp                                         |
| ig EF2300-02 Rev                        | CAT GGC AAT TAC AAG CAG GC  |                                                |
| EF2304 For                              | GTA GCA TGG GTA GCC TAC TT  | 532 bp                                         |
| EF2304 Rev                              | CGT TAC CCA AGT CAG TCT GT  |                                                |
| EF2305 For                              | CGG ACA GCT TTA CTA ATG TG  | 223 bp                                         |
| EF2305 Rev                              | GAG CTG CAA ATA CCA GAA CT  |                                                |
| EF2307 For                              | CCT CCA CCA TTT CTT TCT GG  | 378 bp                                         |
| EF2307 Rev                              | CGC TAC ATG GAC GAA ATC AC  |                                                |
| EF2307 For 2                            | GCT TCC TCG CTG AAA TTC TG  | 227 bp                                         |
| EF2307 Rev 2                            | GCA TGA GTA TTC GCT GTG GT  |                                                |
| EF2313 For                              | CGC CTA ATA CCT TAG ACA GC  | 273 bp                                         |
| EF2313 Rev                              | GAC TAT CCT GAA AAC TAT GGC |                                                |
| EF2314 For                              | GGT AGA ATA CGT TTT CAT CCG | 349 bp                                         |
| EF2314 Rev                              | GGA TAA CAA GCA GAA GCC CT  |                                                |
| EF2321 For                              | CAA TCG TCG ATA CCT CCT CA  | 327 bp                                         |
| EF2321 Rev                              | CCC AAA GAC CTT GCC AAA GT  |                                                |
| <u>Confirmation of polymorphisms</u>    |                             |                                                |
| EF0631 For A                            | GAG ACA GAA GTC GCT AAA GA  | 544 bp. Used to confirm DAP-A mutation.        |
| EF0631 Rev A                            | GGT GCC GAT ATG ATC CGT TA  |                                                |
| EF0631 For BC                           | GCA ACA AAG TGA TTT ACG GG  | 754 bp. Used to confirm DAP-B/DAP-C mutation.  |
| EF0631 Rev BC                           | GTT CAC GGT CAC TGT TAG GA  |                                                |
| <i>brnQ</i> For                         | GCG TTG TTA CAA ACG CCG TA  | 508 bp                                         |
| <i>brnQ</i> Rev                         | CAG TGT TGT ATT GAT GGG GA  |                                                |
| EF2698 For                              | CTG GAG ATC AAA TGG ATG TC  | 292 bp. Also used for serial passage cultures. |
| EF2698 Rev                              | CTT CAG TAA GTC ATT GGT GG  |                                                |
| <i>rpoN</i> For                         | CTC AAC AGC TTC AAC AAT CC  | 458 bp. Also used for serial passage cultures. |
| <i>rpoN</i> Rev                         | CTC GTT CTG TTT GTA GCA TC  |                                                |
| EF1753 For                              | GAC ACT TAG ACT TTC TGG TG  | 334 bp. Also used for serial passage cultures. |
| EF1753 Rev                              | GTG ACA TTG ATG TGG ATG ATG |                                                |
| <i>rpsE</i> For                         | CAA GCT TTA GCT GAA GCT GC  | 659 bp                                         |
| <i>rpsE</i> Rev                         | CCT AAC GCT TTA ACT GTA GCA |                                                |
| EF0716 For                              | GGT TAT GGT ATT GCT GGT TTC | 505 bp. Also used for serial passage cultures. |
| EF0716 Rev                              | CAC ATG GAG GAA TCT TCG TC  |                                                |

---

|                                                                                                               |                                                           |                                                                                                |
|---------------------------------------------------------------------------------------------------------------|-----------------------------------------------------------|------------------------------------------------------------------------------------------------|
| EF2470 For                                                                                                    | GAA GCA GTC TTT CGA TAC GC                                | 770 bp. Also used for serial passage cultures.                                                 |
| EF2470 Rev                                                                                                    | CTG CGT TGA ACG CTA AAC TTA                               |                                                                                                |
| <u>Profiling of EF0631 (cls) in <i>E. faecalis</i> clinical isolates (to obtain complete gene sequence)</u>   |                                                           |                                                                                                |
| EF0631 For A                                                                                                  | GAG ACA GAA GTC GCT AAA GA                                | Primer pair 1; 1028 bp. Also used for serial passage cultures and <i>E. faecalis</i> T2        |
| EF0631 Rev BC                                                                                                 | GTT CAC GGT CAC TGT TAG GA                                |                                                                                                |
| EF0631 close For                                                                                              | CGG AAA AGT AGG CTA CAT TG                                | Primer pair 2; 590 bp                                                                          |
| EF0631 close Rev                                                                                              | CTT CGG ATA TCT TGA TTG GC                                |                                                                                                |
| EF0631 For 3prime                                                                                             | CCT AAC AGT GAC CGT GAA CA                                | Primer pair 3; 804 bp                                                                          |
| EF0631 Rev 3prime                                                                                             | CTT GTA CAT GTA GCA TAT TCC T                             |                                                                                                |
| <u>Profiling of EFTG_00614 (cls) in <i>E. faecium</i> clinical isolates (to obtain partial gene sequence)</u> |                                                           |                                                                                                |
| EFTG_00614 For                                                                                                | GCA CTT ATT GCT TTG GTG GC                                | 1350 bp                                                                                        |
| EFTG_00614 Rev                                                                                                | CCT TGA CTG TTT CAG TTG TCA                               |                                                                                                |
| EFTG_00614 For 2 seq                                                                                          | CAC AAA GGG CAT TAC TTC GTT                               | Sequencing primers                                                                             |
| EFTG_00614 Rev 2 seq                                                                                          | CGA AGC TGG AGC AAA GAA GA                                |                                                                                                |
| <u>EF0631 cloning (for insertion into pAT28 multiple cloning site)</u>                                        |                                                           |                                                                                                |
| EF0631 KpnI For                                                                                               | CGG <u>GGT ACC</u> GGG GTT GCT TAC<br>TTT ACC GA          | 1733 bp for wt V583 and DAP-C; 1724 bp for DAP-A. Restriction enzyme cut sites are underlined. |
| EF0631 XbaI Rev                                                                                               | <u>GCT CTA GAG</u> ACG AAC TTC GGA<br>TCA GAA G           |                                                                                                |
| EF0631 clone check For<br>pAT28 MCS Rev                                                                       | GCC TTT GTA ACG GAT CAT ATC<br>CAC AGA TGC GTA AGG AGA AA | Used with EF0631 For A to confirm sequence of pAT28 inserts                                    |
| EF0631 clone check Rev                                                                                        | CCC GTA AAT CAC TTT GTT GC                                |                                                                                                |
| M13 Forward (-20)                                                                                             | GTA AAA CGA CGG CCA G                                     | 277 bp. Product expected in putative pAT28 EF0631 clones.                                      |
| EF0631 insert check Rev                                                                                       | GCC AAT CAA GAT ATC CGA AGT                               |                                                                                                |

---

**Supplemental Table 2. Resequencing assemblies.**

| Strain         | Total reads <sup>a</sup> | Chr. <sup>b</sup> | Chr. coverage <sup>c</sup> | pTEF1 <sup>b</sup> | pTEF1 coverage <sup>c</sup> | pTEF2 <sup>b</sup> | pTEF2 coverage <sup>c</sup> | pTEF3 <sup>b</sup> | pTEF3 coverage <sup>c</sup> | OLJ137 <sup>b</sup> | OLJ131 <sup>b</sup> | Non-assembled |
|----------------|--------------------------|-------------------|----------------------------|--------------------|-----------------------------|--------------------|-----------------------------|--------------------|-----------------------------|---------------------|---------------------|---------------|
| <b>Control</b> | 8,352,029                | 7,315,097         | 3-302 (90)                 | 265,543            | 17-394 (159)                | 175,900            | 10-312 (121)                | 83,377             | 57-377 (185)                | 302,509             | 1,490               | 208,113       |
| <b>DAP-A</b>   | 10,359,993               | 9,250,032         | 0-392 (109)                | 550,287            | 4-530 (315)                 | 371,327            | 28-400 (245)                | 131,548            | 4-447 (278)                 | 34,182              | 478                 | 22,139        |
| <b>DAP-B</b>   | 10,464,801               | 9,194,598         | 0-406 (109)                | 534,651            | 28-549 (306)                | 361,716            | 26-418 (238)                | 130,885            | 14-457 (277)                | 213,900             | 609                 | 28,442        |
| <b>DAP-C</b>   | 10,769,361               | 9,570,843         | 0-377 (113)                | 484,273            | 3-490 (277)                 | 339,341            | 11-396 (224)                | 116,719            | 6-432 (247)                 | 225,292             | 496                 | 32,397        |

<sup>a</sup>Total single end reads generated by Illumina sequencing, after quality filtering.

<sup>b</sup>Number of reads aligned to reference sequence (chromosome, pTEF1, pTEF2, pTEF3, or Illumina adapters). Chr, chromosome.

<sup>c</sup>Range of fold coverage is shown; average fold coverage is in parentheses.

**Supplemental Table 3. Zero coverage regions in Illumina resequencing assemblies.**

| Strain | ORF                        | Missing sequence relative to reference                               | Confirmation results |
|--------|----------------------------|----------------------------------------------------------------------|----------------------|
| A      | EF2294 <i>vanB</i>         | CCGCCATG                                                             | Gap closed           |
| A      | EF2321                     | CGGCTCGTT                                                            | Gap closed           |
| B      | EF0639                     | CC                                                                   | Gap closed           |
| B      | ig: EF1155-56 <sup>a</sup> | GAGCCACAAGTCCAACCGACT                                                | Gap closed           |
| B      | EF2294 <i>vanB</i>         | AGC                                                                  | Gap closed           |
| B      | ig: EF2300-02              | CAGGCCGTC                                                            | Gap closed           |
| B      | EF2304                     | ATGTCGGCGCTGC                                                        | Gap closed           |
| B      | EF2305                     | CCGCGTCCCCCGCAGGCTG                                                  | Gap closed           |
| B      | EF2307                     | GT                                                                   | Gap closed           |
| B      | EF2307                     | AAACTG                                                               | Gap closed           |
| B      | EF2313                     | AGGCAGGC                                                             | Gap closed           |
| B      | EF2314                     | GGCAG                                                                | Gap closed           |
| C      | EF1797                     | AAAAAGGTTTTTATTTTTTTCGAACCGTATTTAC<br>TG TAGATAATGGTTAAGACGCCTGATAAC | 75 bp deletion       |
| C      | EF2294 <i>vanB</i>         | G                                                                    | Gap closed           |

<sup>a</sup>ig, intergenic region.

**Supplemental Table 4. SNPs and DIPs in the control strain assembly.**

| Reference position        | Variation type     | Reference | Variations | Variation freq. (%) | Counts       | Fold Cvg  | Overlapping annotations                                          | Amino acid change    |
|---------------------------|--------------------|-----------|------------|---------------------|--------------|-----------|------------------------------------------------------------------|----------------------|
| 132143                    | DIP                | -         | G          | 65.4                | 70           | 107       |                                                                  |                      |
| 179987                    | DIP                | A         | -          | 86.4                | 51           | 59        | EF0183, hypothetical protein                                     | Frameshift           |
| 191992                    | SNP                | T         | A          | 100.0               | 85           | 85        | <i>rpsG</i>                                                      |                      |
| 227635                    | DIP                | A         | -          | 81.9                | 95           | 116       |                                                                  |                      |
| 227646                    | DIP                | C         | -          | 77.9                | 102          | 131       |                                                                  |                      |
| 229297                    | DIP                | C         | -          | 90.3                | 93           | 103       |                                                                  |                      |
| <b>445423<sup>a</sup></b> | <b>Complex SNP</b> | <b>A</b>  | <b>A/C</b> | <b>62.8/37.2</b>    | <b>54/32</b> | <b>86</b> | <b>EF0479, site-specific recombinase, phage integrase family</b> | <b>Ser -&gt; Arg</b> |
| 611688                    | SNP                | G         | T          | 100.0               | 81           | 81        | EF0660, MATE efflux family protein                               | Arg -> Ser           |
| 872056                    | SNP                | C         | A          | 100.0               | 94           | 94        | EF0906, conserved hypothetical protein                           |                      |
| 921232                    | SNP                | A         | G          | 100.0               | 61           | 61        | EF0958, PTS system. IIABC components                             |                      |
| 931162                    | SNP                | G         | T          | 100.0               | 68           | 68        |                                                                  |                      |
| 998111                    | SNP                | C         | T          | 100.0               | 93           | 93        |                                                                  |                      |
| 1170952                   | DIP                | -         | T          | 82.2                | 74           | 90        | EF1205                                                           |                      |
| 1303060                   | DIP                | A         | -          | 93.7                | 74           | 79        |                                                                  |                      |
| 1474120                   | SNP                | C         | A          | 100.0               | 52           | 52        | EF1519, cation-transporting ATPase, E1-E2 family                 | Asn -> Lys           |
| 1534568                   | DIP                | A         | -          | 87.7                | 50           | 57        | <i>tkt</i>                                                       |                      |
| 1571355                   | SNP                | C         | T          | 98.6                | 72           | 73        | <i>parC</i>                                                      |                      |
| 1651141                   | SNP                | T         | C          | 100.0               | 46           | 46        | EF1704, sensory box histidine kinase                             |                      |
| 1651146                   | SNP                | T         | C          | 100.0               | 48           | 48        | EF1704, sensory box histidine kinase                             | Leu -> Pro           |
| 1914897                   | DIP                | -         | G          | 86.0                | 74           | 86        | <i>prmA</i>                                                      | Frameshift           |
| 1914901                   | DIP                | G         | -          | 84.9                | 62           | 73        | <i>prmA</i>                                                      | Frameshift           |
| 1917084                   | SNP                | T         | A          | 100.0               | 73           | 73        | EF1979, ATPase, AAA family                                       | Val -> Asp           |
| 2059477                   | DIP                | --        | AA         | 71.1                | 59           | 83        | EF2155                                                           |                      |
| 2117617                   | DIP                | -         | C          | 85.7                | 66           | 77        | EF2204                                                           |                      |
| 2232992                   | DIP                | T         | -          | 80.0                | 20           | 25        | EF2308, hypothetical protein                                     | Frameshift           |
| 2234179                   | DIP                | -         | G          | 94.1                | 48           | 51        |                                                                  |                      |
| 2234474                   | SNP                | C         | G          | 100.0               | 39           | 39        | <i>topB-2</i>                                                    |                      |
| 2309182                   | SNP                | C         | A          | 100.0               | 115          | 115       |                                                                  |                      |
| 2323031                   | DIP                | C         | -          | 89.2                | 66           | 74        | EF2399, acetyltransferase, GNAT family                           | Frameshift           |
| 2325873                   | DIP                | -         | G          | 100.0               | 42           | 42        | EF2405, hypothetical protein                                     | Frameshift           |
| 2452948                   | Complex DIP        | -         | -/C        | 50.0/50.0           | 3/3          | 6         |                                                                  |                      |
| 2452957                   | DIP                | -         | C          | 100.0               | 16           | 16        |                                                                  |                      |
| 2570780                   | SNP                | T         | C          | 98.7                | 76           | 77        |                                                                  |                      |
| 2578163                   | SNP                | C         | G          | 100.0               | 34           | 34        |                                                                  |                      |
| 2677895                   | DIP                | A         | -          | 94.9                | 93           | 98        | EF2772                                                           |                      |
| 3000492                   | DIP                | -         | C          | 94.1                | 64           | 68        | <i>def-2</i>                                                     |                      |
| 3015992                   | SNP                | T         | A          | 99.3                | 134          | 135       |                                                                  |                      |
| 3100859                   | DIP                | G         | -          | 100.0               | 65           | 65        | <i>rplM</i>                                                      |                      |
| 3125849                   | DIP                | -         | C          | 87.7                | 64           | 73        | EF3251, hypothetical protein                                     | Frameshift           |

<sup>a</sup>Complex SNP computationally detected only in the control V583 strain. Note that a similar A/C variation occurs in each of the DAP strains, but below the detection threshold (35%) used for SNP detection.
